# Supplementary material for: Characterization of the interactome of the porcine reproductive and respiratory syndrome virus glycoprotein-5
Source: Springer Nature journal article supplement (doi:10.1007/s00705-018-3787-9), 2018-03-01
Supplement: MOESM1 [file 15500266]

## Sheet: Sheet0
Uniprot	Entry name	Protein names	Organism	Length(amino acid)	Number of Individual peptides	Molecular Weight (kDa)
Q06210	GFPT1_HUMAN	Glutamine--fructose-6-phosphate aminotransferase [isomerizing] 1 (EC 2.6.1.16) (D-fructose-6-phosphate amidotransferase 1) (Glutamine:fructose-6-phosphate amidotransferase 1) (GFAT 1) (GFAT1) (Hexosephosphate aminotransferase 1)	Homo sapiens (Human)	699	2	26
P38646	GRP75_HUMAN	Stress-70 protein, mitochondrial (75 kDa glucose-regulated protein) (GRP-75) (Heat shock 70 kDa protein 9) (Mortalin) (MOT) (Peptide-binding protein 74) (PBP74)	Homo sapiens (Human)	679	5	75
P11166	GTR1_HUMAN	Solute carrier family 2, facilitated glucose transporter member 1 (Glucose transporter type 1, erythrocyte/brain) (GLUT-1) (HepG2 glucose transporter)	Homo sapiens (Human)	492	3	55
P62805	H4_HUMAN	Histone H4	Homo sapiens (Human)	103	3	11
P52272	HNRPM_HUMAN	Heterogeneous nuclear ribonucleoprotein M (hnRNP M)	Homo sapiens (Human)	730	3	81
P11142	HSP7C_HUMAN	Heat shock cognate 71 kDa protein (Heat shock 70 kDa protein 8) (Lipopolysaccharide-associated protein 1) (LAP-1) (LPS-associated protein 1)	Homo sapiens (Human)	646	5	72
P54105	ICLN_HUMAN	Methylosome subunit pICln (Chloride channel, nucleotide sensitive 1A) (Chloride conductance regulatory protein ICln) (I(Cln)) (Chloride ion current inducer protein) (ClCI) (Reticulocyte pICln)	Homo sapiens (Human)	237	2	26
P60842	IF4A1_HUMAN	Eukaryotic initiation factor 4A-I (eIF-4A-I) (eIF4A-I) (EC 3.6.4.13) (ATP-dependent RNA helicase eIF4A-1)	Homo sapiens (Human)	406	4	45
O15230	LAMA5_HUMAN	Laminin subunit alpha-5 (Laminin-10 subunit alpha) (Laminin-11 subunit alpha) (Laminin-15 subunit alpha)	Homo sapiens (Human)	3695	3	410
O15397	IPO8_HUMAN	Importin-8 (Imp8) (Ran-binding protein 8) (RanBP8)	Homo sapiens (Human)	1037	2	115
Q14573	ITPR3_HUMAN	Inositol 1,4,5-trisphosphate receptor type 3 (IP3 receptor isoform 3) (IP3R 3) (InsP3R3) (Type 3 inositol 1,4,5-trisphosphate receptor) (Type 3 InsP3 receptor)	Homo sapiens (Human)	2671	3	296
Q5T749	KPRP_HUMAN	Keratinocyte proline-rich protein (hKPRP)	Homo sapiens (Human)	579	2	64
P36776	LONM_HUMAN	Lon protease homolog, mitochondrial (EC 3.4.21.-) (LONHs) (Lon protease-like protein) (LONP) (Mitochondrial ATP-dependent protease Lon) (Serine protease 15)	Homo sapiens (Human)	959	2	106
Q9UPN3	MACF1_HUMAN	Microtubule-actin cross-linking factor 1, isoforms 1/2/3/5 (620 kDa actin-binding protein) (ABP620) (Actin cross-linking family protein 7) (Macrophin-1) (Trabeculin-alpha)	Homo sapiens (Human)	7388	6	820
Q70IA6	MOB2_HUMAN	MOB kinase activator 2 (HCCA2) (Mob2 homolog) (Mps one binder kinase activator-like 2)	Homo sapiens (Human)	237	2	26
Q00325	MPCP_HUMAN	Phosphate carrier protein, mitochondrial (Phosphate transport protein) (PTP) (Solute carrier family 25 member 3)	Homo sapiens (Human)	362	3	40
Q9ULV0	MYO5B_HUMAN	Unconventional myosin-Vb	Homo sapiens (Human)	1848	2	205
Q15233	NONO_HUMAN	Non-POU domain-containing octamer-binding protein (NonO protein) (54 kDa nuclear RNA- and DNA-binding protein) (55 kDa nuclear protein) (DNA-binding p52/p100 complex, 52 kDa subunit) (NMT55) (p54(nrb)) (p54nrb)	Homo sapiens (Human)	471	2	52
Q15084	PDIA6_HUMAN	Protein disulfide-isomerase A6 (EC 5.3.4.1) (Endoplasmic reticulum protein 5) (ER protein 5) (ERp5) (Protein disulfide isomerase P5) (Thioredoxin domain-containing protein 7)	Homo sapiens (Human)	440	2	49
Q99623	PHB2_HUMAN	Prohibitin-2 (B-cell receptor-associated protein BAP37) (D-prohibitin) (Repressor of estrogen receptor activity)	Homo sapiens (Human)	299	10	33
P78527	PRKDC_HUMAN	DNA-dependent protein kinase catalytic subunit (DNA-PK catalytic subunit) (DNA-PKcs) (EC 2.7.11.1) (DNPK1) (p460)	Homo sapiens (Human)	4128	9	458
O43242	PSMD3_HUMAN	26S proteasome non-ATPase regulatory subunit 3 (26S proteasome regulatory subunit RPN3) (26S proteasome regulatory subunit S3) (Proteasome subunit p58)	Homo sapiens (Human)	534	2	59
Q13200	PSMD2_HUMAN	26S proteasome non-ATPase regulatory subunit 2 (26S proteasome regulatory subunit RPN1) (26S proteasome regulatory subunit S2) (26S proteasome subunit p97) (Protein 55.11) (Tumor necrosis factor type 1 receptor-associated protein 2)	Homo sapiens (Human)	908	2	100
P63244	RACK1_HUMAN	Receptor of activated protein C kinase 1 (Cell proliferation-inducing gene 21 protein) (Guanine nucleotide-binding protein subunit beta-2-like 1) (Guanine nucleotide-binding protein subunit beta-like protein 12.3) (Human lung cancer oncogene 7 protein) (HLC-7) (Receptor for activated C kinase) (Small ribosomal subunit protein RACK1) [Cleaved into: Receptor of activated protein C kinase 1, N-termi…	Homo sapiens (Human)	317	5	35
P36578	RL4_HUMAN	60S ribosomal protein L4 (60S ribosomal protein L1) (Large ribosomal subunit protein uL4)	Homo sapiens (Human)	427	7	47
P62424	RL7A_HUMAN	60S ribosomal protein L7a (Large ribosomal subunit protein eL8) (PLA-X polypeptide) (Surfeit locus protein 3)	Homo sapiens (Human)	266	4	30
P18124	RL7_HUMAN	60S ribosomal protein L7 (Large ribosomal subunit protein uL30)	Homo sapiens (Human)	248	7	28
Q02878	RL6_HUMAN	60S ribosomal protein L6 (Large ribosomal subunit protein eL6) (Neoplasm-related protein C140) (Tax-responsive enhancer element-binding protein 107) (TaxREB107)	Homo sapiens (Human)	288	4	32
P39023	RL3_HUMAN	60S ribosomal protein L3 (HIV-1 TAR RNA-binding protein B) (TARBP-B) (Large ribosomal subunit protein uL3)	Homo sapiens (Human)	403	6	45
P09651	ROA1_HUMAN	Heterogeneous nuclear ribonucleoprotein A1 (hnRNP A1) (Helix-destabilizing protein) (Single-strand RNA-binding protein) (hnRNP core protein A1) [Cleaved into: Heterogeneous nuclear ribonucleoprotein A1, N-terminally processed]	Homo sapiens (Human)	372	2	41
P15880	RS2_HUMAN	40S ribosomal protein S2 (40S ribosomal protein S4) (Protein LLRep3) (Small ribosomal subunit protein uS5)	Homo sapiens (Human)	293	3	33
Q9Y6N5	SQRD_HUMAN	Sulfide:quinone oxidoreductase, mitochondrial (SQOR) (EC 1.8.5.-)	Homo sapiens (Human)	450	3	50
Q9Y2H1	ST38L_HUMAN	Serine/threonine-protein kinase 38-like (EC 2.7.11.1) (NDR2 protein kinase) (Nuclear Dbf2-related kinase 2)	Homo sapiens (Human)	464	8	52
P40227	TCPZ_HUMAN	T-complex protein 1 subunit zeta (TCP-1-zeta) (Acute morphine dependence-related protein 2) (CCT-zeta-1) (HTR3) (Tcp20)	Homo sapiens (Human)	531	2	59
P09493	TPM1_HUMAN	Tropomyosin alpha-1 chain (Alpha-tropomyosin) (Tropomyosin-1)	Homo sapiens (Human)	284	2	32
P08670	VIME_HUMAN	Vimentin	Homo sapiens (Human)	466	6	48
P12956	XRCC6_HUMAN	X-ray repair cross-complementing protein 6 (EC 3.6.4.-) (EC 4.2.99.-) (5'-deoxyribose-5-phosphate lyase Ku70) (5'-dRP lyase Ku70) (70 kDa subunit of Ku antigen) (ATP-dependent DNA helicase 2 subunit 1) (ATP-dependent DNA helicase II 70 kDa subunit) (CTC box-binding factor 75 kDa subunit) (CTC75) (CTCBF) (DNA repair protein XRCC6) (Lupus Ku autoantigen protein p70) (Ku70) (Thyroid-lupus autoantige…	Homo sapiens (Human)	609	3	83
Q12904	AIMP1_HUMAN	Aminoacyl tRNA synthase complex-interacting multifunctional protein 1 (Multisynthase complex auxiliary component p43) [Cleaved into: Endothelial monocyte-activating polypeptide 2 (EMAP-2) (Endothelial monocyte-activating polypeptide II) (EMAP-II) (Small inducible cytokine subfamily E member 1)]	Homo sapiens (Human)	312	2	87
P05141	ADT2_HUMAN	ADP/ATP translocase 2 (ADP,ATP carrier protein 2) (ADP,ATP carrier protein, fibroblast isoform) (Adenine nucleotide translocator 2) (ANT 2) (Solute carrier family 25 member 5) [Cleaved into: ADP/ATP translocase 2, N-terminally processed]	Homo sapiens (Human)	298	2	33
P12236	ADT3_HUMAN	ADP/ATP translocase 3 (ADP,ATP carrier protein 3) (ADP,ATP carrier protein, isoform T2) (ANT 2) (Adenine nucleotide translocator 3) (ANT 3) (Solute carrier family 25 member 6) [Cleaved into: ADP/ATP translocase 3, N-terminally processed]	Homo sapiens (Human)	298	4	33
P25705	ATPA_HUMAN	ATP synthase subunit alpha, mitochondrial	Homo sapiens (Human)	553	5	60
P16615	AT2A2_HUMAN	Sarcoplasmic/endoplasmic reticulum calcium ATPase 2 (SERCA2) (SR Ca(2+)-ATPase 2) (EC 3.6.3.8) (Calcium pump 2) (Calcium-transporting ATPase sarcoplasmic reticulum type, slow twitch skeletal muscle isoform) (Endoplasmic reticulum class 1/2 Ca(2+) ATPase)	Homo sapiens (Human)	1042	8	92
P06576	ATPB_HUMAN	ATP synthase subunit beta, mitochondrial (EC 3.6.3.14)	Homo sapiens (Human)	529	5	56
P27824	CALX_HUMAN	Calnexin (IP90) (Major histocompatibility complex class I antigen-binding protein p88) (p90)	Homo sapiens (Human)	592	4	68
P35606	COPB2_HUMAN	Coatomer subunit beta' (Beta'-coat protein) (Beta'-COP) (p102)	Homo sapiens (Human)	906	2	103
P53621	COPA_HUMAN	Coatomer subunit alpha (Alpha-coat protein) (Alpha-COP) (HEP-COP) (HEPCOP) [Cleaved into: Xenin (Xenopsin-related peptide); Proxenin]	Homo sapiens (Human)	1224	4	138
Q03135	CAV1_HUMAN	Caveolin-1	Homo sapiens (Human)	178	2	20
P47710	CASA1_HUMAN	Alpha-S1-casein [Cleaved into: Casoxin-D]	Homo sapiens (Human)	185	4	24
Q00610	CLH1_HUMAN	Clathrin heavy chain 1 (Clathrin heavy chain on chromosome 17) (CLH-17)	Homo sapiens (Human)	1675	9	192
P10809	CH60_HUMAN	60 kDa heat shock protein, mitochondrial (EC 3.6.4.9) (60 kDa chaperonin) (Chaperonin 60) (CPN60) (Heat shock protein 60) (HSP-60) (Hsp60) (HuCHA60) (Mitochondrial matrix protein P1) (P60 lymphocyte protein)	Homo sapiens (Human)	573	4	61
Q08211	DHX9_HUMAN	ATP-dependent RNA helicase A (RHA) (EC 3.6.4.13) (DEAH box protein 9) (Leukophysin) (LKP) (Nuclear DNA helicase II) (NDH II)	Homo sapiens (Human)	1270	3	141
Q8IXB1	DJC10_HUMAN	DnaJ homolog subfamily C member 10 (EC 1.8.4.-) (Endoplasmic reticulum DNA J domain-containing protein 5) (ER-resident protein ERdj5) (ERdj5) (Macrothioredoxin) (MTHr)	Homo sapiens (Human)	793	2	88
Q14204	DYHC1_HUMAN	Cytoplasmic dynein 1 heavy chain 1 (Cytoplasmic dynein heavy chain 1) (Dynein heavy chain, cytosolic)	Homo sapiens (Human)	4646	6	532
P26641	EF1G_HUMAN	Elongation factor 1-gamma (EF-1-gamma) (eEF-1B gamma)	Homo sapiens (Human)	437	3	50
Q08554	DSC1_HUMAN	Desmocollin-1 (Cadherin family member 1) (Desmosomal glycoprotein 2/3) (DG2/DG3)	Homo sapiens (Human)	894	2	100
P68104	EF1A1_HUMAN	Elongation factor 1-alpha 1 (EF-1-alpha-1) (Elongation factor Tu) (EF-Tu) (Eukaryotic elongation factor 1 A-1) (eEF1A-1) (Leukocyte receptor cluster member 7)	Homo sapiens (Human)	462	7	50
P14625	ENPL_HUMAN	Endoplasmin (94 kDa glucose-regulated protein) (GRP-94) (Heat shock protein 90 kDa beta member 1) (Tumor rejection antigen 1) (gp96 homolog)	Homo sapiens (Human)	803	8	92
Q9NZB2	F120A_HUMAN	Constitutive coactivator of PPAR-gamma-like protein 1 (Oxidative stress-associated Src activator) (Protein FAM120A)	Homo sapiens (Human)	1118	3	122
Q00839	HNRPU_HUMAN	Heterogeneous nuclear ribonucleoprotein U (hnRNP U) (Scaffold attachment factor A) (SAF-A) (p120) (pp120)	Homo sapiens (Human)	825	7	89
P31943	HNRH1_HUMAN	Heterogeneous nuclear ribonucleoprotein H (hnRNP H) [Cleaved into: Heterogeneous nuclear ribonucleoprotein H, N-terminally processed]	Homo sapiens (Human)	449	4	49
P07900	HS90A_HUMAN	Heat shock protein HSP 90-alpha (Heat shock 86 kDa) (HSP 86) (HSP86) (Lipopolysaccharide-associated protein 2) (LAP-2) (LPS-associated protein 2) (Renal carcinoma antigen NY-REN-38)	Homo sapiens (Human)	732	3	85
Q96N66	MBOA7_HUMAN	Lysophospholipid acyltransferase 7 (LPLAT 7) (EC 2.3.1.-) (1-acylglycerophosphatidylinositol O-acyltransferase) (EC 2.3.1.n4) (Bladder and breast carcinoma-overexpressed gene 1 protein) (Leukocyte receptor cluster member 4) (Lysophosphatidylinositol acyltransferase) (LPIAT) (Lyso-PI acyltransferase) (Membrane-bound O-acyltransferase domain-containing protein 7) (O-acyltransferase domain-containin…	Homo sapiens (Human)	472	2	17
P35579	MYH9_HUMAN	Myosin-9 (Cellular myosin heavy chain, type A) (Myosin heavy chain 9) (Myosin heavy chain, non-muscle IIa) (Non-muscle myosin heavy chain A) (NMMHC-A) (Non-muscle myosin heavy chain IIa) (NMMHC II-a) (NMMHC-IIA)	Homo sapiens (Human)	1960	5	154
O43795	MYO1B_HUMAN	Unconventional myosin-Ib (MYH-1c) (Myosin I alpha) (MMI-alpha) (MMIa)	Homo sapiens (Human)	1136	2	132
Q14CX7	NAA25_HUMAN	N-alpha-acetyltransferase 25, NatB auxiliary subunit (Mitochondrial distribution and morphology protein 20) (N-terminal acetyltransferase B complex subunit MDM20) (NatB complex subunit MDM20) (N-terminal acetyltransferase B complex subunit NAA25) (p120)	Homo sapiens (Human)	972	2	36
P06748	NPM_HUMAN	Nucleophosmin (NPM) (Nucleolar phosphoprotein B23) (Nucleolar protein NO38) (Numatrin)	Homo sapiens (Human)	294	6	35
Q15366	PCBP2_HUMAN	Poly(rC)-binding protein 2 (Alpha-CP2) (Heterogeneous nuclear ribonucleoprotein E2) (hnRNP E2)	Homo sapiens (Human)	365	3	78
P84098	RL19_HUMAN	60S ribosomal protein L19 (Large ribosomal subunit protein eL19)	Homo sapiens (Human)	196	2	23
Q07020	RL18_HUMAN	60S ribosomal protein L18 (Large ribosomal subunit protein eL18)	Homo sapiens (Human)	188	4	22
Q02543	RL18A_HUMAN	60S ribosomal protein L18a (Large ribosomal subunit protein eL20)	Homo sapiens (Human)	176	2	21
P46779	RL28_HUMAN	60S ribosomal protein L28 (Large ribosomal subunit protein eL28)	Homo sapiens (Human)	137	3	16
P23396	RS3_HUMAN	40S ribosomal protein S3 (EC 4.2.99.18) (Small ribosomal subunit protein uS3)	Homo sapiens (Human)	243	8	27
P61247	RS3A_HUMAN	40S ribosomal protein S3a (Small ribosomal subunit protein eS1) (v-fos transformation effector protein) (Fte-1)	Homo sapiens (Human)	264	6	30
P62280	RS11_HUMAN	40S ribosomal protein S11 (Small ribosomal subunit protein uS17)	Homo sapiens (Human)	158	5	18
P62847	RS24_HUMAN	40S ribosomal protein S24 (Small ribosomal subunit protein eS24)	Homo sapiens (Human)	133	3	15
P62753	RS6_HUMAN	40S ribosomal protein S6 (Phosphoprotein NP33) (Small ribosomal subunit protein eS6)	Homo sapiens (Human)	249	3	29
P07814	SYEP_HUMAN	Bifunctional glutamate/proline--tRNA ligase (Bifunctional aminoacyl-tRNA synthetase) (Cell proliferation-inducing gene 32 protein) (Glutamatyl-prolyl-tRNA synthetase) [Includes: Glutamate--tRNA ligase (EC 6.1.1.17) (Glutamyl-tRNA synthetase) (GluRS); Proline--tRNA ligase (EC 6.1.1.15) (Prolyl-tRNA synthetase)]	Homo sapiens (Human)	1512	3	171
Q15208	STK38_HUMAN	Serine/threonine-protein kinase 38 (EC 2.7.11.1) (NDR1 protein kinase) (Nuclear Dbf2-related kinase 1)	Homo sapiens (Human)	465	8	54
P27105	STOM_HUMAN	Erythrocyte band 7 integral membrane protein (Protein 7.2b) (Stomatin)	Homo sapiens (Human)	288	2	32
Q9Y657	SPIN1_HUMAN	Spindlin-1 (Ovarian cancer-related protein) (Spindlin1)	Homo sapiens (Human)	262	3	30
P14868	SYDC_HUMAN	Aspartate--tRNA ligase, cytoplasmic (EC 6.1.1.12) (Aspartyl-tRNA synthetase) (AspRS) (Cell proliferation-inducing gene 40 protein)	Homo sapiens (Human)	501	4	57
Q9P2J5	SYLC_HUMAN	Leucine--tRNA ligase, cytoplasmic (EC 6.1.1.4) (Leucyl-tRNA synthetase) (LeuRS)	Homo sapiens (Human)	1176	3	134
P54136	SYRC_HUMAN	Arginine--tRNA ligase, cytoplasmic (EC 6.1.1.19) (Arginyl-tRNA synthetase) (ArgRS)	Homo sapiens (Human)	660	2	87
O00268	TAF4_HUMAN	Transcription initiation factor TFIID subunit 4 (RNA polymerase II TBP-associated factor subunit C) (TBP-associated factor 4) (Transcription initiation factor TFIID 130 kDa subunit) (TAF(II)130) (TAFII-130) (TAFII130) (Transcription initiation factor TFIID 135 kDa subunit) (TAF(II)135) (TAFII-135) (TAFII135)	Homo sapiens (Human)	1085	2	110
P23381	SYWC_HUMAN	Tryptophan--tRNA ligase, cytoplasmic (EC 6.1.1.2) (Interferon-induced protein 53) (IFP53) (Tryptophanyl-tRNA synthetase) (TrpRS) (hWRS) [Cleaved into: T1-TrpRS; T2-TrpRS]	Homo sapiens (Human)	471	2	17
P55072	TERA_HUMAN	Transitional endoplasmic reticulum ATPase (TER ATPase) (EC 3.6.4.6) (15S Mg(2+)-ATPase p97 subunit) (Valosin-containing protein) (VCP)	Homo sapiens (Human)	806	2	89
P24752	THIL_HUMAN	Acetyl-CoA acetyltransferase, mitochondrial (EC 2.3.1.9) (Acetoacetyl-CoA thiolase) (T2)	Homo sapiens (Human)	427	2	45
P13010	XRCC5_HUMAN	X-ray repair cross-complementing protein 5 (EC 3.6.4.-) (86 kDa subunit of Ku antigen) (ATP-dependent DNA helicase 2 subunit 2) (ATP-dependent DNA helicase II 80 kDa subunit) (CTC box-binding factor 85 kDa subunit) (CTC85) (CTCBF) (DNA repair protein XRCC5) (Ku80) (Ku86) (Lupus Ku autoantigen protein p86) (Nuclear factor IV) (Thyroid-lupus autoantigen) (TLAA) (X-ray repair complementing defective…	Homo sapiens (Human)	732	3	83
Q6I9V5	Q6I9V5_HUMAN	SLC25A6 protein (Solute carrier family 25 (Mitochondrial carrier adenine nucleotide translocator), member 6) (cDNA, FLJ92654, highly similar to Homo sapiens solute carrier family 25 (mitochondrial carrier; adenine nucleotide translocator), member 6 (SLC25A6), mRNA)	Homo sapiens (Human)	298	3	40
V9HW80	V9HW80_HUMAN	Epididymis luminal protein 220 (Epididymis secretory protein Li 70)	Homo sapiens (Human)	806	2	30
B0I1S9	B0I1S9_HUMAN	MYO1B variant protein (Myosin IB, isoform CRA_a)	Homo sapiens (Human)	1136	2	132
Q6IPS9	Q6IPS9_HUMAN	Elongation factor 1-alpha	Homo sapiens (Human)	462	7	50
V9HWP2	V9HWP2_HUMAN	Epididymis luminal protein 35 (Epididymis secretory sperm binding protein Li 125m) (Heat shock protein 90kDa beta (Grp94), member 1, isoform CRA_b)	Homo sapiens (Human)	803	2	30
Q6IPH7	Q6IPH7_HUMAN	RPL14 protein (Ribosomal protein L14 variant)	Homo sapiens (Human)	220	2	24
A6H8K3	A6H8K3_HUMAN	ITPR3 protein (Fragment)	Homo sapiens (Human)	1049	2	39
Q4W4Y1	Q4W4Y1_HUMAN	Dopamine receptor interacting protein 4	Homo sapiens (Human)	868	4	96
D9YZV4	D9YZV4_HUMAN	Tropomyosin 1 (Alpha) isoform 1	Homo sapiens (Human)	284	2	33
B0QY89	B0QY89_HUMAN	Eukaryotic translation initiation factor 3 subunit L (eIF3l) (Eukaryotic translation initiation factor 3 subunit 6-interacting protein) (Eukaryotic translation initiation factor 3 subunit E-interacting protein)	Homo sapiens (Human)	607	2	52
Q96IF9	Q96IF9_HUMAN	VCP protein (Fragment)	Homo sapiens (Human)	644	2	89
Q59FG2	Q59FG2_HUMAN	Low density lipoprotein-related protein 1 variant (Fragment)	Homo sapiens (Human)	2359	2	498
V9HW65	V9HW65_HUMAN	Annexin	Homo sapiens (Human)	339	2	39
A4D1M5	A4D1M5_HUMAN	Similar to ribosomal protein S14	Homo sapiens (Human)	350	2	16
X5D2T3	X5D2T3_HUMAN	Ribosomal protein L10 isoform A (Fragment)	Homo sapiens (Human)	214	5	25
Q4LE36	Q4LE36_HUMAN	ACLY variant protein (Fragment)	Homo sapiens (Human)	1137	5	125
B3KU66	B3KU66_HUMAN	cDNA FLJ39263 fis, clone OCBBF2009571, highly similar to ATP-dependent RNA helicase A (EC 3.6.1.-)	Homo sapiens (Human)	549	3	141
Q6ZSD7	Q6ZSD7_HUMAN	cDNA FLJ45612 fis, clone BRTHA3025073, highly similar to Actin cross-linking family protein 7	Homo sapiens (Human)	1062	6	620
Q6MZF9	Q6MZF9_HUMAN	Putative uncharacterized protein DKFZp686J11229 (Fragment)	Homo sapiens (Human)	52	2	17
Q6FHP5	Q6FHP5_HUMAN	PHB protein (Fragment)	Homo sapiens (Human)	272	6	30
Q0VAB1	Q0VAB1_HUMAN	Translocase of inner mitochondrial membrane 50 homolog (S. cerevisiae)	Homo sapiens (Human)	456	2	50
Q8WYN9	Q8WYN9_HUMAN	Ribosomal protein S27A (Fragment)	Homo sapiens (Human)	121	2	14
Q6IAX5	Q6IAX5_HUMAN	Eukaryotic translation initiation factor 3 subunit E (eIF3e) (Eukaryotic translation initiation factor 3 subunit 6) (eIF-3 p48)	Homo sapiens (Human)	445	2	52
Q59ES2	Q59ES2_HUMAN	Inositol 1,4,5-trisphosphate receptor type 3 variant (Fragment)	Homo sapiens (Human)	2341	3	304
E9KL35	E9KL35_HUMAN	Epididymis tissue sperm binding protein Li 3a	Homo sapiens (Human)	317	5	35
F7HQY4	F7HQY4_MACMU	Uncharacterized protein	Macaca mulatta (Rhesus macaque)	563	2	64
Q4R5M3	ANM5_MACFA	Protein arginine N-methyltransferase 5 (EC 2.1.1.320) (Histone-arginine N-methyltransferase PRMT5) (Shk1 kinase-binding protein 1 homolog) (SKB1 homolog)	Macaca fascicularis (Crab-eating macaque) (Cynomolgus monkey)	637	12	73
Q5R636	PFKAP_PONAB	ATP-dependent 6-phosphofructokinase, platelet type (ATP-PFK) (PFK-P) (EC 2.7.1.11) (6-phosphofructokinase type C) (Phosphofructo-1-kinase isozyme C) (PFK-C) (Phosphohexokinase)	Pongo abelii (Sumatran orangutan) (Pongo pygmaeus abelii)	784	2	86
Q5R7Y8	RL8_PONAB	60S ribosomal protein L8	Pongo abelii (Sumatran orangutan) (Pongo pygmaeus abelii)	257	3	28
Q5RBS3	SERPH_PONAB	Serpin H1 (Collagen-binding protein) (Colligin)	Pongo abelii (Sumatran orangutan) (Pongo pygmaeus abelii)	417	6	46
Q5R8Z3	EF2_PONAB	Elongation factor 2 (EF-2)	Pongo abelii (Sumatran orangutan) (Pongo pygmaeus abelii)	858	2	95
Q5RF26	NUCL_PONAB	Nucleolin	Pongo abelii (Sumatran orangutan) (Pongo pygmaeus abelii)	712	3	77
Q5RF79	Q5RF79_PONAB	Signal transducer and activator of transcription	Pongo abelii (Sumatran orangutan) (Pongo pygmaeus abelii)	722	8	88
Q5R6Q0	Q5R6Q0_PONAB	Putative uncharacterized protein DKFZp459G021	Pongo abelii (Sumatran orangutan) (Pongo pygmaeus abelii)	795	2	29
Q99BU0	Q99BU0_PRRSV	Membrane protein M	Porcine reproductive and respiratory syndrome virus (PRRSV)	174	5	19
