# Supplementary material for: Characterization of the interactome of the porcine reproductive and respiratory syndrome virus glycoprotein-5
Source: Springer Nature journal article supplement (doi:10.1007/s00705-018-3787-9), 2018-03-01
Supplement: MOESM3 [file 15500266]

## Sheet: KEGG Pathway classification
Level one	Level two	Number of Proteins
Metabolism	Carbohydrate metabolism	9
Metabolism	Energy metabolism	5
Metabolism	Lipid metabolism	3
Metabolism	Amino acid metabolism	5
Metabolism	Metabolism of cofactors and vitamins	1
Metabolism	Metabolism of terpenoids and polyketides	1
Metabolism	Xenobiotics biodegradation and metabolism	1
Genetic information processing	Transcription	5
Genetic information processing	Translation	26
Genetic information processing	Folding, sorting and degradation	12
Genetic information processing	Replication and repair	1
Environmental information processing	Signal transduction	23
Environmental information processing	Signaling molecules and interaction	1
Cellular process	Transport and catabolism	6
Cellular process	Cell growth and death	9
Cellular process	Cellular community - eukaryotes	5
Organismal systems	Immune system	11
Organismal systems	Endocrine system	22
Organismal systems	Circulatory system	3
Organismal systems	Digestive system	5
Organismal systems	Excretory system	2
Organismal systems	Nervous system	8
Organismal systems	Sensory system	2
Organismal systems	Aging	3
Organismal systems	Environmental adaptation	3
Human disease	Cancers	23
Human disease	Immune diseases	2
Human disease	Neurodegenerative diseases	13
Human disease	Substance dependence	1
Human disease	Cardiovascular diseases	6
Human disease	Endocrine and metabolic diseases	5
Human disease	Infectious diseases	30
Human disease	Drug resistance	2

## Sheet: Details
Level one	Level two	Level three	Map ID	Number Of Protein	Pathway ID(Ko ID)	KOs	Description
Metabolism (7)
	Carbohydrate metabolism (9)
		Glycolysis / Gluconeogenesis	10	1	ko00010	K00850	pfkA, PFK; 6-phosphofructokinase 1
		Pentose phosphate pathway	30	1	ko00030	K00850	pfkA, PFK; 6-phosphofructokinase 1
		Fructose and mannose metabolism	51	1	ko00051	K00850	pfkA, PFK; 6-phosphofructokinase 1
		Galactose metabolism	52	1	ko00052	K00850	pfkA, PFK; 6-phosphofructokinase 1
		Amino sugar and nucleotide sugar metabolism	520	1	ko00520	K00820	glmS, GFPT; glucosamine--fructose-6-phosphate aminotransferase (isomerizing)
		Pyruvate metabolism	620	1	ko00620	K00626	atoB; acetyl-CoA C-acetyltransferase
		Glyoxylate and dicarboxylate metabolism	630	1	ko00630	K00626	atoB; acetyl-CoA C-acetyltransferase
		Propanoate metabolism	640	1	ko00640	K00626	atoB; acetyl-CoA C-acetyltransferase
		Butanoate metabolism	650	1	ko00650	K00626	atoB; acetyl-CoA C-acetyltransferase
	Energy metabolism (4)
		Oxidative phosphorylation	190	2	ko00190	K02132	ATPeF1A, ATP5A1, ATP1; F-type H+-transporting ATPase subunit alpha
						K02133	ATPeF1B, ATP5B, ATP2; F-type H+-transporting ATPase subunit beta
		Carbon fixation pathways in prokaryotes	720	1	ko00720	K00626	atoB; acetyl-CoA C-acetyltransferase
		Methane metabolism	680	1	ko00680	K00850	pfkA, PFK; 6-phosphofructokinase 1
		Sulfur metabolism	920	1	ko00920	K17218	sqr; sulfide:quinone oxidoreductase
	Lipid metabolism (3)	Fatty acid degradation	71	1	ko00071	K00626	atoB; acetyl-CoA C-acetyltransferase
		Synthesis and degradation of ketone bodies	72	1	ko00072	K00626	atoB; acetyl-CoA C-acetyltransferase
		Glycerophospholipid metabolism	564	1	ko00564	K13516	MBOAT7; lysophospholipid acyltransferase 7
	Amino acid metabolism (5)
		Alanine, aspartate and glutamate metabolism	250	1	ko00250	K00820	glmS, GFPT; glucosamine--fructose-6-phosphate aminotransferase (isomerizing)
		Valine, leucine and isoleucine degradation	280	1	ko00280	K00626	atoB; acetyl-CoA C-acetyltransferase
		Lysine degradation	310	1	ko00310	K00626	atoB; acetyl-CoA C-acetyltransferase
		Arginine and proline metabolism	330	1	ko00330	K12657	ALDH18A1, P5CS; delta-1-pyrroline-5-carboxylate synthetase
		Tryptophan metabolism	380	1	ko00380	K00626	atoB; acetyl-CoA C-acetyltransferase
	Metabolism of cofactors and vitamins (1)
		Porphyrin and chlorophyll metabolism	860	1	ko00860	K14163	EPRS; bifunctional glutamyl/prolyl-tRNA synthetase
	Metabolism of terpenoids and polyketide (1)
		Terpenoid backbone biosynthesis	900	1	ko00900	K00626	atoB; acetyl-CoA C-acetyltransferase
	Xenobiotics biodegradation and metabolism (1)
		Benzoate degradation	362	1	ko00362	K00626	atoB; acetyl-CoA C-acetyltransferase
Genetic information processing (4)
	Transcription (2)
		Basal transcription factors	3022	1	ko03022	K03129	TAF4; transcription initiation factor TFIID subunit 4
		Spliceosome	3040	4	ko03040	K03283	HSPA1_8; heat shock 70kDa protein 1/8
						K12741	HNRNPA1_3; heterogeneous nuclear ribonucleoprotein A1/A3
						K12887	HNRNPM; heterogeneous nuclear ribonucleoprotein M
						K12888	HNRNPU; heterogeneous nuclear ribonucleoprotein U
	Translation (3)
		Ribosome	3010	18	ko03010	K02992	RP-S7, MRPS7, rpsG; small subunit ribosomal protein S7
						K02981	RP-S2e, RPS2; small subunit ribosomal protein S2e
						K02985	RP-S3e, RPS3; small subunit ribosomal protein S3e
						K02984	RP-S3Ae, RPS3A; small subunit ribosomal protein S3Ae
						K02991	RP-S6e, RPS6; small subunit ribosomal protein S6e
						K02949	RP-S11e, RPS11; small subunit ribosomal protein S11e
						K02974	RP-S24e, RPS24; small subunit ribosomal protein S24e
						K02925	RP-L3e, RPL3; large subunit ribosomal protein L3e
						K02930	RP-L4e, RPL4; large subunit ribosomal protein L4e
						K02934	RP-L6e, RPL6; large subunit ribosomal protein L6e
						K02937	RP-L7e, RPL7; large subunit ribosomal protein L7e
						K02936	RP-L7Ae, RPL7A; large subunit ribosomal protein L7Ae
						K02938	RP-L8e, RPL8; large subunit ribosomal protein L8e
						K02866	RP-L10e, RPL10; large subunit ribosomal protein L10e
						K02883	RP-L18e, RPL18; large subunit ribosomal protein L18e
						K02882	RP-L18Ae, RPL18A; large subunit ribosomal protein L18Ae
						K02885	RP-L19e, RPL19; large subunit ribosomal protein L19e
						K02903	RP-L28e, RPL28; large subunit ribosomal protein L28e
		Aminoacyl-tRNA biosynthesis	970	5	ko00970	K14163	EPRS; bifunctional glutamyl/prolyl-tRNA synthetase
						K01876	DARS, aspS; aspartyl-tRNA synthetase
						K01869	LARS, leuS; leucyl-tRNA synthetase
						K01887	RARS, argS; arginyl-tRNA synthetase
						K01867	WARS, trpS; tryptophanyl-tRNA synthetase
		RNA transport	3013	3	ko03013	K03231	EEF1A; elongation factor 1-alpha
						K05019	CLNS1A; chloride channel, nucleotide-sensitive, 1A
						K03257	EIF4A; translation initiation factor 4A
	Folding, sorting and degradation (3)
		Protein processing in endoplasmic reticulum	4141	7	ko04141	K09530	DNAJC10; DnaJ homolog subfamily C member 10
						K09487	HSP90B, TRA1; heat shock protein 90kDa beta
						K08054	CANX; calnexin
						K09584	PDIA6, TXNDC7; protein disulfide-isomerase A6 [EC:5.3.4.1
						K13525	VCP, CDC48; transitional endoplasmic reticulum ATPase
						K03283	HSPA1_8; heat shock 70kDa protein 1/8
						K04079	HSP90A, htpG; molecular chaperone HtpG
		Proteasome	3050	2	ko03050	K03033	PSMD3, RPN3; 26S proteasome regulatory subunit N3
						K03028	PSMD2, RPN1; 26S proteasome regulatory subunit N1
		RNA degradation	3018	3	ko03018	K00850	pfkA, PFK; 6-phosphofructokinase 1 [EC:2.7.1.11]
						K04043	dnaK; molecular chaperone DnaK
						K04077	groEL, HSPD1; chaperonin GroEL
	Replication and repair (1)
		Non-homologous end-joining	3450	3	ko03450	K10884	XRCC6, KU70, G22P1; ATP-dependent DNA helicase 2 subunit 1
						K10885	XRCC5, KU80, G22P2; ATP-dependent DNA helicase 2 subunit 2
						K06642	PRKDC; DNA-dependent protein kinase catalytic subunit
Environmental information processing (2)
	Signal transduction (12)
		Two-component system	2020	1	ko02020	K00626	atoB; acetyl-CoA C-acetyltransferase
		MAPK signaling pathway	4010	1	ko04010	K03283	HSPA1_8; heat shock 70kDa protein 1/8
		Apelin signaling pathway	4371	2	ko04371	K04960	ITPR3; inositol 1,4,5-triphosphate receptor type 3
						K02991	RP-S6e, RPS6; small subunit ribosomal protein S6e
		Jak-STAT signaling pathway	4630	1	ko04630	K04692	STAT3; signal transducer and activator of transcription 3
		HIF-1 signaling pathway	4066	3	ko04066	K04692	STAT3; signal transducer and activator of transcription 3
						K02991	RP-S6e, RPS6; small subunit ribosomal protein S6e
						K07299	SLC2A1, GLUT1; MFS transporter, SP family, solute carrier family 2 (facilitated glucose transporter), member 1
		FoxO signaling pathway	4068	1	ko04068	K04692	STAT3; signal transducer and activator of transcription 3
		Calcium signaling pathway	4020	3	ko04020	K05853	ATP2A; Ca2+ transporting ATPase, sarcoplasmic/endoplasmic reticulum [EC:3.6.3.8]
						K04960	ITPR3; inositol 1,4,5-triphosphate receptor type 3
						K05863	SLC25A4S, ANT; solute carrier family 25 (mitochondrial adenine nucleotide translocator), member 4/5/6/31
		Phosphatidylinositol signaling system	4070	1	ko04070	K04960	ITPR3; inositol 1,4,5-triphosphate receptor type 3
		cGMP - PKG signaling pathway	4022	3	ko04022	K05853	ATP2A; Ca2+ transporting ATPase, sarcoplasmic/endoplasmic reticulum [EC:3.6.3.8]
						K04960	ITPR3; inositol 1,4,5-triphosphate receptor type 3
						K05863	SLC25A4S, ANT; solute carrier family 25 (mitochondrial adenine nucleotide translocator), member 4/5/6/31
		PI3K-Akt signaling pathway	4151	4	ko04151	K06240	LAMA3_5; laminin, alpha 3/5
						K02991	RP-S6e, RPS6; small subunit ribosomal protein S6e
						K04079	HSP90A, htpG; molecular chaperone HtpG
						K09487	HSP90B, TRA1; heat shock protein 90kDa beta
		AMPK signaling pathway	4152	2	ko04152	K00850	pfkA, PFK; 6-phosphofructokinase 1 [EC:2.7.1.11]
						K03234	EEF2; elongation factor 2
		mTOR signaling pathway	4150	1	ko04150	K02991	RP-S6e, RPS6; small subunit ribosomal protein S6e
	Signaling molecules and interaction (1)
		ECM-receptor interaction	4512	1	ko04512	K06240	LAMA3_5; laminin, alpha 3/5
Cellular process (3)
	Transport and catabolism (3)
		Endocytosis	4144	3	ko04144	K04646	CLTC; clathrin heavy chain
						K03283	HSPA1_8; heat shock 70kDa protein 1/8
						K06278	CAV1; caveolin 1
		Phagosome	4145	2	ko04145	K10413	DYNC1H; dynein heavy chain 1, cytosolic
						K08054	CANX; calnexin
		Lysosome	4142	1	ko04142	K04646	CLTC; clathrin heavy chain
	Cell growth and death (6)
		Cell cycle	4110	1	ko04110	K06642	PRKDC; DNA-dependent protein kinase catalytic subunit
		Oocyte meiosis	4114	1	ko04114	K04960	ITPR3; inositol 1,4,5-triphosphate receptor type 3
		Apoptosis	4210	1	ko04210	K04960	ITPR3; inositol 1,4,5-triphosphate receptor type 3
		Ferroptosis	4216	1	ko04216	K13162	PCBP2; poly(rC)-binding protein 2
		Necroptosis	4217	3	ko04217	K05863	SLC25A4S, ANT; solute carrier family 25 (mitochondrial adenine nucleotide translocator), member 4/5/6/31
						K04692	STAT3; signal transducer and activator of transcription 3
						K04079	HSP90A, htpG; molecular chaperone HtpG
		Cellular senescence	4218	2	ko04218	K04960	ITPR3; inositol 1,4,5-triphosphate receptor type 3
						K05863	SLC25A4S, ANT; solute carrier family 25 (mitochondrial adenine nucleotide translocator), member 4/5/6/31
	Cellular community - eukaryotes (4)
		Focal adhesion	4510	2	ko04510	K06240	LAMA3_5; laminin, alpha 3/5
						K06278	CAV1; caveolin 1
		Tight junction	4530	1	ko04530	K10352	MYH; myosin heavy chain
		Gap junction	4540	1	ko04540	K04960	ITPR3; inositol 1,4,5-triphosphate receptor type 3
		Signaling pathways regulating pluripotency of stem cells	4550	1	ko04550	K04692	STAT3; signal transducer and activator of transcription 3
Organismal systems (9)
	Immune system (6)
		Platelet activation	4611	1	ko04611	K04960	ITPR3; inositol 1,4,5-triphosphate receptor type 3
		NOD-like receptor signaling pathway	4621	2	ko04621	K04960	ITPR3; inositol 1,4,5-triphosphate receptor type 3
						K04079	HSP90A, htpG; molecular chaperone HtpG
		Antigen processing and presentation	4612	3	ko04612	K03283	HSPA1_8; heat shock 70kDa protein 1/8
						K04079	HSP90A, htpG; molecular chaperone HtpG
						K08054	CANX; calnexin
		Th17 cell differentiation	4659	2	ko04659	K04692	STAT3; signal transducer and activator of transcription 3
						K04079	HSP90A, htpG; molecular chaperone HtpG
		IL-17 signaling pathway	4657	2	ko04657	K04079	HSP90A, htpG; molecular chaperone HtpG
						K09487	HSP90B, TRA1; heat shock protein 90kDa beta
		Chemokine signaling pathway	4062	1	ko04062	K04692	STAT3; signal transducer and activator of transcription 3
	Endocrine system (13)
		Insulin secretion	4911	2	ko04911	K07299	SLC2A1, GLUT1; MFS transporter, SP family, solute carrier family 2 (facilitated glucose transporter), member 1
						K04960	ITPR3; inositol 1,4,5-triphosphate receptor type 3
		Insulin signaling pathway	4910	1	ko04910	K02991	RP-S6e, RPS6; small subunit ribosomal protein S6e
		Glucagon signaling pathway	4922	2	ko04922	K04960	ITPR3; inositol 1,4,5-triphosphate receptor type 3
						K07299	SLC2A1, GLUT1; MFS transporter, SP family, solute carrier family 2 (facilitated glucose transporter), member 1
		Adipocytokine signaling pathway	4920	2	ko04920	K04692	STAT3; signal transducer and activator of transcription 3
						K07299	SLC2A1, GLUT1; MFS transporter, SP family, solute carrier family 2 (facilitated glucose transporter), member 1
		GnRH signaling pathway	4912	1	ko04912	K04960	ITPR3; inositol 1,4,5-triphosphate receptor type 3
		Estrogen signaling pathway	4915	4	ko04915	K04079	HSP90A, htpG; molecular chaperone HtpG
						K09487	HSP90B, TRA1; heat shock protein 90kDa beta
						K03283	HSPA1_8; heat shock 70kDa protein 1/8
						K04960	ITPR3; inositol 1,4,5-triphosphate receptor type 3
		Progesterone-mediated oocyte maturation	4914	1	ko04914	K04079	HSP90A, htpG; molecular chaperone HtpG
		Prolactin signaling pathway	4917	1	ko04917	K04692	STAT3; signal transducer and activator of transcription 3
		Oxytocin signaling pathway	4921	2	ko04921	K03234	EEF2; elongation factor 2
						K04960	ITPR3; inositol 1,4,5-triphosphate receptor type 3
		Thyroid hormone synthesis	4918	3	ko04918	K09487	HSP90B, TRA1; heat shock protein 90kDa beta
						K08054	CANX; calnexin
						K04960	ITPR3; inositol 1,4,5-triphosphate receptor type 3
		Thyroid hormone signaling pathway	4919	1	ko04919	K07299	SLC2A1, GLUT1; MFS transporter, SP family, solute carrier family 2 (facilitated glucose transporter), member 1
		Renin secretion	4924	1	ko04924	K04960	ITPR3; inositol 1,4,5-triphosphate receptor type 3
		Aldosterone synthesis and secretion	4925	1	ko04925	K04960	ITPR3; inositol 1,4,5-triphosphate receptor type 3
	Circulatory system (3)
		Cardiac muscle contraction	4260	1	ko04260	K10373	TPM1; tropomyosin 1
		Adrenergic signaling in cardiomyocytes	4261	1	ko04261	K10373	TPM1; tropomyosin 1
		Vascular smooth muscle contraction	4270	1	ko04270	K04960	ITPR3; inositol 1,4,5-triphosphate receptor type 3
	Digestive system (4)
		Salivary secretion	4970	1	ko04970	K04960	ITPR3; inositol 1,4,5-triphosphate receptor type 3
		Gastric acid secretion	4971	1	ko04971	K04960	ITPR3; inositol 1,4,5-triphosphate receptor type 3
		Pancreatic secretion	4972	2	ko04972	K04960	ITPR3; inositol 1,4,5-triphosphate receptor type 3
						K05853	ATP2A; Ca2+ transporting ATPase, sarcoplasmic/endoplasmic reticulum
		Bile secretion	4976	1	ko04976	K07299	SLC2A1, GLUT1; MFS transporter, SP family, solute carrier family 2 (facilitated glucose transporter), member 1
	Excretory system (2)
		Vasopressin-regulated water reabsorption	4962	1	ko04962	K10413	DYNC1H; dynein heavy chain 1, cytosolic
		Endocrine and other factor-regulated calcium reabsorption	4961	1	ko04961	K04646	CLTC; clathrin heavy chain
	Nervous system (8)
		Glutamatergic synapse	4724	1	ko04724	K04960	ITPR3; inositol 1,4,5-triphosphate receptor type 3
		Cholinergic synapse	4725	1	ko04725	K04960	ITPR3; inositol 1,4,5-triphosphate receptor type 3
		Dopaminergic synapse	4728	1	ko04728	K04960	ITPR3; inositol 1,4,5-triphosphate receptor type 3
		Serotonergic synapse	4726	1	ko04726	K04960	ITPR3; inositol 1,4,5-triphosphate receptor type 3
		Long-term potentiation	4720	1	ko04720	K04960	ITPR3; inositol 1,4,5-triphosphate receptor type 3
		Long-term depression	4730	1	ko04730	K04960	ITPR3; inositol 1,4,5-triphosphate receptor type 3
		Retrograde endocannabinoid signaling	4723	1	ko04723	K04960	ITPR3; inositol 1,4,5-triphosphate receptor type 3
		Synaptic vesicle cycle	4721	1	ko04721	K04646	CLTC; clathrin heavy chain
	Sensory system (2)
		Taste transduction	4742	1	ko04742	K04960	ITPR3; inositol 1,4,5-triphosphate receptor type 3
		Inflammatory mediator regulation of TRP channels	4750	1	ko04750	K04960	ITPR3; inositol 1,4,5-triphosphate receptor type 3
	Aging (2)
		Longevity regulating pathway - worm	4212	2	ko04212	K04043	dnaK; molecular chaperone DnaK
						K04077	groEL, HSPD1; chaperonin GroEL
		Longevity regulating pathway - multiple species	4213	1	ko04213	K03283	HSPA1_8; heat shock 70kDa protein 1/8
	Environmental adaptation (2)
		Circadian entrainment	4713	1	ko04713	K04960	ITPR3; inositol 1,4,5-triphosphate receptor type 3
		Plant-pathogen interaction	4626	2	ko04626	K09487	HSP90B, TRA1; heat shock protein 90kDa beta
						K04079	HSP90A, htpG; molecular chaperone HtpG
Human disease (8)
	Cancers (11)
		Pathways in cancer	5200	5	ko05200	K06240	LAMA3_5; laminin, alpha 3/5
						K04692	STAT3; signal transducer and activator of transcription 3
						K07299	SLC2A1, GLUT1; MFS transporter, SP family, solute carrier family 2 (facilitated glucose transporter), member 1
						K04079	HSP90A, htpG; molecular chaperone HtpG
						K09487	HSP90B, TRA1; heat shock protein 90kDa beta
		Central carbon metabolism in cancer	5230	2	ko05230	K07299	SLC2A1, GLUT1; MFS transporter, SP family, solute carrier family 2 (facilitated glucose transporter), member 1
						K00850	pfkA, PFK; 6-phosphofructokinase 1
		MicroRNAs in cancer	5206	3	ho05206	K10373	TPM1; tropomyosin 1
						K04692	STAT3; signal transducer and activator of transcription 3
						K07606	VIM; vimentin
		Proteoglycans in cancer	5205	4	ko05205	K04960	ITPR3; inositol 1,4,5-triphosphate receptor type 3
						K04692	STAT3; signal transducer and activator of transcription 3
						K02991	RP-S6e, RPS6; small subunit ribosomal protein S6e
						K06278	CAV1; caveolin 1
		Viral carcinogenesis	5203	2	ko05203	K04692	STAT3; signal transducer and activator of transcription 3
						K11254	H4; histone H4
		Pancreatic cancer	5212	1	ko05212	K04692	STAT3; signal transducer and activator of transcription 3
		Acute myeloid leukemia	5221	1	ko05221	K04692	STAT3; signal transducer and activator of transcription 3
		Renal cell carcinoma	5211	1	ko05211	K07299	SLC2A1, GLUT1; MFS transporter, SP family, solute carrier family 2 (facilitated glucose transporter), member 1
		Prostate cancer	5215	2	ko05215	K04079	HSP90A, htpG; molecular chaperone HtpG
						K09487	HSP90B, TRA1; heat shock protein 90kDa beta
		Small cell lung cancer	5222	1	ko05222	K06240	LAMA3_5; laminin, alpha 3/5
		Non-small cell lung cancer	5223	1	ko05223	K04692	STAT3; signal transducer and activator of transcription 3
	Immune diseases (2)
		Systemic lupus erythematosus	5322	1	ko05322	K11254	H4; histone H4
		Inflammatiory bowel disease (IBD)	5321	1	ko05321	K04692	STAT3; signal transducer and activator of transcription 3
	Neurodegenerative diseases (3)
		Alzheimer's disease	5010	5	ko05010	K02132	ATPeF1A, ATP5A1, ATP1; F-type H+-transporting ATPase subunit alpha
						K02133	ATPeF1B, ATP5B, ATP2; F-type H+-transporting ATPase subunit beta
						K04550	LRP1, CD91; low-density lipoprotein receptor-related protein 1 (alpha-2-macroglobulin receptor)
						K04960	ITPR3; inositol 1,4,5-triphosphate receptor type 3
						K05853	ATP2A; Ca2+ transporting ATPase, sarcoplasmic/endoplasmic reticulum [EC:3.6.3.8]
		Parkinson's disease	5012	3	ko05012	K02132	ATPeF1A, ATP5A1, ATP1; F-type H+-transporting ATPase subunit alpha
						K02133	ATPeF1B, ATP5B, ATP2; F-type H+-transporting ATPase subunit beta
						K05863	SLC25A4S, ANT; solute carrier family 25 (mitochondrial adenine nucleotide translocator), member 4/5/6/31
		Huntington's disease	5016	5	ko05016	K04646	CLTC; clathrin heavy chain
						K03129	TAF4; transcription initiation factor TFIID subunit 4
						K02132	ATPeF1A, ATP5A1, ATP1; F-type H+-transporting ATPase subunit alpha
						K02133	ATPeF1B, ATP5B, ATP2; F-type H+-transporting ATPase subunit beta [EC:3.6.3.14]
						K05863	SLC25A4S, ANT; solute carrier family 25 (mitochondrial adenine nucleotide translocator), member 4/5/6/31
	Substance dependence (1)
		Alcoholism	5034	1	ko05034	K11254	H4; histone H4
	Cardiovascular diseases (4)
		Fluid shear stress and atherosclerosis	5418	3	ko05418	K04079	HSP90A, htpG; molecular chaperone HtpG
						K09487	HSP90B, TRA1; heat shock protein 90kDa beta
						K06278	CAV1; caveolin 1
		Hypertrophic cardiomyopathy (HCM)	5410	1	ko05410	K10373	TPM1; tropomyosin 1
		Dilated cardiomyopathy (DCM)	5414	1	ko05414	K10373	TPM1; tropomyosin 1
		Viral myocarditis	5416	1	ko05416	K06278	CAV1; caveolin 1
	Endocrine and metabolic diseases (3)
		Type I diabetes mellitus	4940	1	ko04940	K04077	groEL, HSPD1; chaperonin GroEL
		Insulin resistance	4931	3	ko04931	K04692	STAT3; signal transducer and activator of transcription 3
						K07299	SLC2A1, GLUT1; MFS transporter, SP family, solute carrier family 2 (facilitated glucose transporter), member 1
						K00820	glmS, GFPT; glucosamine--fructose-6-phosphate aminotransferase (isomerizing) [EC:2.6.1.16]
		AGE-RAGE signaling pathway in diabetic complications	4933	1	ko04933	K04692	STAT3; signal transducer and activator of transcription 3
	Infectious diseases (16)
		Pathogenic Escherichia coli infection	5130	1	ko05130	K11294	NCL, NSR1; nucleolin
		Salmonella infection	5132	1	ko05132	K10413	DYNC1H; dynein heavy chain 1, cytosolic
		Legionellosis	5134	5	ko05134	K04077	groEL, HSPD1; chaperonin GroEL
						K13525	VCP, CDC48; transitional endoplasmic reticulum ATPase
						K03231	EEF1A; elongation factor 1-alpha
						K03283	HSPA1_8; heat shock 70kDa protein 1/8
						K03233	EEF1G; elongation factor 1-gamma
		Tuberculosis	5152	2	ko05152	K04043	dnaK; molecular chaperone DnaK
						K04077	groEL, HSPD1; chaperonin GroEL
		Bacterial invasion of epithelial cells	5100	2	ko05100	K04646	CLTC; clathrin heavy chain
						K06278	CAV1; caveolin 1
		HTLV-I infection	5166		ko05166	K07299	SLC2A1, GLUT1; MFS transporter, SP family, solute carrier family 2 (facilitated glucose transporter), member 1
						K08054	CANX; calnexin
						K05863	SLC25A4S, ANT; solute carrier family 25 (mitochondrial adenine nucleotide translocator), member 4/5/6/31
		Measles	5162	3	ko05162	K04692	STAT3; signal transducer and activator of transcription 3
						K14753	RACK1; guanine nucleotide-binding protein subunit beta-2-like 1 protein
						K03283	HSPA1_8; heat shock 70kDa protein 1/8
		Influenza A	5164	1	ko05164	K03283	HSPA1_8; heat shock 70kDa protein 1/8
		Hepatitis B	5161	1	ko05161	K04692	STAT3; signal transducer and activator of transcription 3
		Hepatitis C	5160	1	ko05160	K04692	STAT3; signal transducer and activator of transcription 3
		Herpes simplex infection	5168	1	ko05168	K03129	TAF4; transcription initiation factor TFIID subunit 4
		Kaposi's sarcoma-associated herpesvirus infection	5167	2	ko05167	K04960	ITPR3; inositol 1,4,5-triphosphate receptor type 3
						K04692	STAT3; signal transducer and activator of transcription 3
		Epstein-Barr virus infection	5169	5	ko05169	K03283	HSPA1_8; heat shock 70kDa protein 1/8
						K03028	PSMD2, RPN1; 26S proteasome regulatory subunit N1
						K03033	PSMD3, RPN3; 26S proteasome regulatory subunit N3
						K07606	VIM; vimentin
						K04692	STAT3; signal transducer and activator of transcription 3
		Amoebiasis	5146	1	ko05146	K06240	LAMA3_5; laminin, alpha 3/5
		Malaria	5144	1	ko05144	K04550	LRP1, CD91; low-density lipoprotein receptor-related protein 1 (alpha-2-macroglobulin receptor)
		Toxoplasmosis	5145	3	ko05145	K03283	HSPA1_8; heat shock 70kDa protein 1/8
						K06240	LAMA3_5; laminin, alpha 3/5
						K04692	STAT3; signal transducer and activator of transcription 3
	Drug resistance (1)
		EGFR tyrosine kinase inhibitor resistance	1521	2	ko01521	K04692	STAT3; signal transducer and activator of transcription 3
						K02991	RP-S6e, RPS6; small subunit ribosomal protein S6e
